# Supplementary material
Source: bioRxiv or medRxiv preprint supplement (https://www.biorxiv.org/highwire/filestream/68322/field_highwire_adjunct_files/1/222869-2.pdf)
Supplement: Supplementary file [file 222869-2.pdf]

## Supplement

### Supplementary texts

#### PBcR settings

PBcR, from the Celera WGS version 8.3, release candidate 1, was used. We used the following command line options:

```
PBcR -sensitive -libraryname shrimp_pacbio_round2-3-4 -s pacbio.spec -f  
astq_linebreak shrimp_pb_data.fastq
```

Where the file pacbio.spec contained the following:

```
asmOvlErrorRate=0.1  
asmUtgErrorRate=0.1  
asmCnsErrorRate=0.1  
asmCgwErrorRate=0.1  
asmOBT=1  
asmObtErrorRate=0.08  
asmObtErrorLimit=4.5  
utgGraphErrorRate=0.05  
utgMergeErrorRate=0.05  
ovlHashBits=24  
ovlHashLoad=0.8  
utgMergeErrorLimit=5.25  
useGrid=1  
scriptOnGrid=1  
ovlCorrOnGrid=1  
frgCorrOnGrid=1  
ovlMemory=128  
ovlStoreMemory=128000  
threads=32  
ovlConcurrency=1  
cnsConcurrency=32  
merylThreads=32  
merylMemory=128000  
frgCorrThreads = 16  
frgCorrBatchSize = 100000  
ovlCorrBatchSize = 100000}
```

#### DBG2OLC settings

We ran DBG2OLC with the following command line options:

```
./DBG20LC_Linux k 17 KmerCovTh 2 MinOverlap 20 AdaptiveTh 0.002 LD1 0 MinLen 200 Contigs linebreak platanus_contigs.fa RemoveChimera 1 f pacbio_data.fa
```

## quickmerge settings

We ran quickmerge with the following command line options:

```
python merge_wrapper.py -pre merged_quivered_shrimp_assemblies -hco 5.0 -c 1.5 -l 1000000 linebreak hybrid_assembly.fasta .self_assembly.fasta
```

## BWA settings

BWA and samtools command line settings for aligning and filtering reads were as follows:

```
bwa aln -t ${CORES} $REFPATH $FDATAPATH > ${OUTPATH}.F.sai
bwa aln -t ${CORES} $REFPATH $RDATAPATH > ${OUTPATH}.R.sai
bwa sampe ${REFPATH} ${OUTPATH}.F.sai ${OUTPATH}.R.sai $FDATAPATH $RDATAPATH | samtools view -q 20 -bS - | samtools sort - data/bam/$PREFIX
```

## picard-tools settings

picard-tools command line settings for deduplication were as follows:

```
java -jar picard.jar MarkDuplicates INPUT=${prefix}.bam OUTPUT=${prefix}.dedup.bam METRICS_FILE=${prefix}.dedup.metrics.txt REMOVE_DUPLICATES=true
```

## GATK settings

GATK command line settings for calling SNPs were as follows:

```
java -d64 -Xmx128g -jar GenomeAnalysisTK.jar -T UnifiedGenotyper -nt ${CORES} -R ${REFPATH} -I merged-realigned-deduped.bam -gt_mode DISCOVERY -stand_call_conf 30 -stand_emit_conf 10 -o rawSNPS-Q30_v2.vcf
java -d64 -Xmx128g -jar GenomeAnalysisTK.jar -T VariantAnnotator -nt ${CORES} -R ${REFPATH} -I merged-realigned-deduped.bam -G StandardAnnotation -V:variant,VCF rawSNPS-Q30_v2.vcf -XA SnpEff -o rawSNPS-Q30-annotated_v2.vcf
java -d64 -Xmx128g -jar GenomeAnalysisTK.jar -T UnifiedGenotyper -nt ${CORES} -R ${REFPATH} -I merged-realigned-deduped.bam -gt_mode DISCOVERY -glm INDEL -stand_call_conf 30 -stand_emit_conf 10 -o inDels-Q30_v2.vcf
java -d64 -Xmx20g -jar GenomeAnalysisTK.jar -T VariantFiltration -R ${REFPATH} -V rawSNPS-Q30-annotated_v2.vcf --mask inDels-Q30_v2.vcf --maskExtension 5 --maskName InDel --clusterWindowSize 10 --filterExpression "MQ0 >= 4 && ((MQ0 / (1.0 * DP)) > 0.1)" --filterName "BadValidation" --filterExpression "QUAL < 30.0" --filterName "LowQual" --filterExpression "QD < 5.0" --filterName "LowVQCBD" --filterExpression "FS > 60" --filterName "FisherStrand" -o Q30-SNPs_v2.vcf
cat Q30-SNPs_v2.vcf | grep 'PASS|textasciicircum#' > only-PASS-Q30-SNPs
```

```

_v2.vcf
java -d64 -Xmx20g -jar GenomeAnalysisTK.jar -T VariantFiltration -R ${R
EFPATH} -V inDels-Q30_v2.vcf --clusterWindowSize 10 --filterExpression
"MQ0 >= 4 && ((MQ0 / (1.0 * DP)) > 0.1)" --filterName "BadValidation" -
-filterExpression "QUAL < 30.0" --filterName "LowQual" --filterExpressi
on "QD < 5.0" --filterName "LowVQCBD" --filterExpression "FS > 60" --fi
lterName "FisherStrand" -o Q30-INDEL_v2.vcf
cat Q30-INDEL_v2.vcf | grep 'PASS|textasciicircum#' > only-PASS-Q30-IND
EL_v2.vcf

```

## Supplementary tables

| Cutoff | N50     | Contigs | Length    | Largest  |
|--------|---------|---------|-----------|----------|
| 82     | 1420491 | 253     | 120342282 | 4450974  |
| 83     | 1450029 | 251     | 120059725 | 4448668  |
| 84     | 1424862 | 230     | 119347677 | 10883472 |
| 85     | 1926101 | 210     | 118647318 | 10769207 |
| 86     | 1886292 | 183     | 116223020 | 7955201  |
| 87     | 219999  | 864     | 106905299 | 1281479  |
| 88     | 34294   | 1080    | 29263120  | 130428   |
| 89     | 9895    | 20      | 156585    | 21076    |
| 90     | 14014   | 3       | 22150     | 14014    |
| 91     | 12650   | 3       | 21171     | 12650    |
| 92     | 12644   | 3       | 21161     | 12644    |

Supplementary Table 1: Assembly statistics for hybrid genome assemblies using various quality thresholds.

| GO type  | GO term    | Description                                           | P-value  | FDR q-value |
|----------|------------|-------------------------------------------------------|----------|-------------|
| Function | GO:0042302 | structural constituent of cuticle                     | 2.44E-06 | 5.32E-03    |
| Function | GO:0008061 | chitin binding                                        | 3.10E-06 | 3.38E-03    |
| Function | GO:0008010 | structural constituent of chitin-based larval cuticle | 5.31E-06 | 3.87E-03    |
| Function | GO:0005214 | structural constituent of chitin-based cuticle        | 2.34E-05 | 1.28E-02    |
| Function | GO:0004180 | carboxypeptidase activity                             | 2.52E-05 | 1.10E-02    |
| Function | GO:0004099 | chitin deacetylase activity                           | 8.21E-05 | 2.99E-02    |

|           |            |                                                   |          |          |
|-----------|------------|---------------------------------------------------|----------|----------|
| Function  | GO:0016490 | structural constituent of peritrophic membrane    | 1.93E-04 | 6.03E-02 |
| Function  | GO:0070026 | nitric oxide binding                              | 4.34E-04 | 1.19E-01 |
| Function  | GO:0070025 | carbon monoxide binding                           | 4.34E-04 | 1.05E-01 |
| Function  | GO:0019826 | oxygen sensor activity                            | 4.34E-04 | 9.49E-02 |
| Function  | GO:0030594 | neurotransmitter receptor activity                | 8.06E-04 | 1.60E-01 |
| Function  | GO:0008094 | DNA-dependent ATPase activity                     | 9.34E-04 | 1.70E-01 |
| Component | GO:0000796 | condensin complex                                 | 4.70E-06 | 4.54E-03 |
| Component | GO:0005576 | extracellular region                              | 1.77E-05 | 8.55E-03 |
| Component | GO:0044815 | DNA packaging complex                             | 2.36E-05 | 7.60E-03 |
| Component | GO:0008074 | guanylate cyclase complex soluble                 | 4.34E-04 |          |
| Component | GO:0044421 | extracellular region part                         | 9.80E-04 | 1.89E-01 |
| Process   | GO:0006022 | aminoglycan metabolic process                     | 3.79E-05 | 2.12E-01 |
| Process   | GO:1903046 | meiotic cell cycle process                        | 4.48E-05 | 1.25E-01 |
| Process   | GO:0006030 | chitin metabolic process                          | 5.61E-05 | 1.05E-01 |
| Process   | GO:1901071 | glucosamine-containing compound metabolic process | 1.08E-04 | 1.51E-01 |
| Process   | GO:0006040 | amino sugar metabolic process                     | 1.32E-04 | 1.47E-01 |
| Process   | GO:1903047 | mitotic cell cycle process                        | 1.98E-04 | 1.84E-01 |
| Process   | GO:0040003 | chitin-based cuticle development                  | 2.63E-04 | 2.10E-01 |
| Process   | GO:0007366 | periodic partitioning by pair rule gene           | 3.96E-04 | 2.76E-01 |
| Process   | GO:0006721 | terpenoid metabolic process                       | 5.05E-04 | 3.13E-01 |
| Process   | GO:0007512 | adult heart development                           | 6.52E-04 | 3.64E-01 |
| Process   | GO:000737  | cephalic furrow formation                         | 6.52E-   | 3.31E-   |

|         |           |                     |          |          |
|---------|-----------|---------------------|----------|----------|
|         | 6         |                     | 04       | 01       |
| Process | GO:004233 | cuticle development | 9.47E-04 | 4.40E-01 |

Supplementary Table2: GO terms for differentially expressed genes between males and hermaphrodites.

## Supplementary figures

*Supplementary Figure 1: A bootstrap consensus maximum likelihood tree, generated using 300 bootstrap iterations in MEGA, comparing the predicted translations of putative clam shrimp HOX genes to D. melanogaster HOX genes. Clam shrimp genes are assumed to be orthologous to D. melanogaster genes that are sister to them.*

*Supplementary Figure 2: A bootstrap consensus maximum likelihood tree, generated using 300 bootstrap iterations in MEGA, comparing the CDS sequences putative clam shrimp HOX genes to D. melanogaster HOX genes. Because of the degree of divergence between sequences, this tree had to be created using an approach that allows the usage of information at sites that are missing in some sequences. Thus, it is less trustworthy than the protein tree, and was not used to call orthologs. The exception to this is the two unannotated genes: their genomic sequences were included in this tree, and they were found to be orthologous to D. melanogaster Scr.*

*Supplementary Figure 3: A set of line diagrams indicating the mapping of a set of markers onto the putative sex chromosome using a variety of methods. The methods are as follow, from top to bottom: 1. BLAST alignment results of the markers onto the genome assembly contigs that we hypothesize make up the sex chromosome. 2. A linkage map of the sex chromosome from a hermaphrodite cross, as performed in Weeks 2010. 3. A linkage map of the sex chromosome from a male \* hermaphrodite cross, as performed in Weeks 2010. The length of the hermaphrodite linkage map is scaled to the assembly contig lengths according to the genome-wide recombination rate calculated in this paper. Note that the total map distance in hermaphrodites resembles the total physical distance in the assembly, but the total map distance in males is much larger.*

*Supplementary Figure 4: A histogram indicating the number of polymorphic loci across the genome in the inbred JT4(4)5-L strain. The JT4(4)5-L inbred strain Illumina sequencing data was aligned to the final reference and SNPs were called with GATK. Plotted here are histogram bins (width of 100kb) containing counts of polymorphic loci. SNPs with estimated frequencies less than 5% or greater than 95% were excluded to avoid calling errors as SNPs. Some contigs seem to contain a small amount of residual heterozygosity, while others are nearly free of polymorphism. The regions of residual heterozygosity are generally associated with the small contigs, perhaps explaining their inability to assemble to larger sizes, or perhaps indicating that these*

*smaller contigs harbor middle repetitive DNA consistent with their being heterochromatic.*

### **Supplementary references**

1. Weeks SC, Benvenuto C, Sanderson TF, Duff RJ. Sex chromosome evolution in the clam shrimp, *Eulimnadia texana*. *Journal of Evolutionary Biology*. 2010;23:1100–1106.
